# Supplementary material for: British Thoracic Society Training Standards for Thoracic Ultrasound (TUS)
Source: HighWire-hosted journal article supplement (doi:10.1136/bmjresp-2019-000552), 2020-05-01
Supplement: bmjresp-2019-000552supp001_data_supplement.pdf [file bmjresp-2019-000552supp001_data_supplement.pdf]

## Appendix 1: DOPS for Thoracic Ultrasound

**Date of Assessment:** \_\_\_/\_\_\_/\_\_\_\_\_

**Trainees Details:** Name: \_\_\_\_\_

GMC number: \_\_\_\_\_

Trainee's Year: \_\_\_\_\_

**Assessor's Details:** Name: \_\_\_\_\_

Grade: \_\_\_\_\_

Email: \_\_\_\_\_

Registration number: \_\_\_\_\_

**Case summary:** \_\_\_\_\_

**Case complexity:** Low  Medium  High

**Please grade the following areas using the scale below:**

| a) Well below expectations for stage of training | b) Below expectations for stage of training | c) Borderline for stage of training | d) Meets expectations for stage of training | e) Above expectation for stage of training | f) Well above expectations for stage of training | U/C) Unable to Comment* |
|--------------------------------------------------|---------------------------------------------|-------------------------------------|---------------------------------------------|--------------------------------------------|--------------------------------------------------|-------------------------|
|--------------------------------------------------|---------------------------------------------|-------------------------------------|---------------------------------------------|--------------------------------------------|--------------------------------------------------|-------------------------|

**Explains procedure to patient and obtains informed consent:**

| a) | b) | c) | d) | e) | f) | U/C) |
|----|----|----|----|----|----|------|
|----|----|----|----|----|----|------|

**Demonstrates knowledge of equipment; handles and cares for it appropriately:**

| a) | b) | c) | d) | e) | f) | U/C) |
|----|----|----|----|----|----|------|
|----|----|----|----|----|----|------|

**Patient positioning and comfort during procedure:**

|    |    |    |    |    |    |      |
|----|----|----|----|----|----|------|
| a) | b) | c) | d) | e) | f) | U/C) |
|----|----|----|----|----|----|------|

**Demonstrates anatomical landmarks (kidneys, liver, spleen, hemidiaphragm):**

|    |    |    |    |    |    |      |
|----|----|----|----|----|----|------|
| a) | b) | c) | d) | e) | f) | U/C) |
|----|----|----|----|----|----|------|

**Correctly describes function and any abnormalities of the hemi-diaphragm (eg motion, orientation and pathology eg nodularity):**

|    |    |    |    |    |    |      |
|----|----|----|----|----|----|------|
| a) | b) | c) | d) | e) | f) | U/C) |
|----|----|----|----|----|----|------|

**Demonstrates areas of normal lung:**

|    |    |    |    |    |    |      |
|----|----|----|----|----|----|------|
| a) | b) | c) | d) | e) | f) | U/C) |
|----|----|----|----|----|----|------|

**Identifies presence of pleural fluid**

|    |    |    |    |    |    |      |
|----|----|----|----|----|----|------|
| a) | b) | c) | d) | e) | f) | U/C) |
|----|----|----|----|----|----|------|

**Identifies and measures maximum depth of any pleural effusion:**

|    |    |    |    |    |    |      |
|----|----|----|----|----|----|------|
| a) | b) | c) | d) | e) | f) | U/C) |
|----|----|----|----|----|----|------|

**Describes characteristics of pleural effusion (eg echogenicity, septation, loculation)**

|    |    |    |    |    |    |      |
|----|----|----|----|----|----|------|
| a) | b) | c) | d) | e) | f) | U/C) |
|----|----|----|----|----|----|------|

**Identifies any further thoracic pathologies (eg pleural thickening, consolidated lung, A and B lines)**

|    |    |    |    |    |    |      |
|----|----|----|----|----|----|------|
| a) | b) | c) | d) | e) | f) | U/C) |
|----|----|----|----|----|----|------|

**Identifies a safe site for a pleural procedure to be performed:**

|    |    |    |    |    |    |      |
|----|----|----|----|----|----|------|
| a) | b) | c) | d) | e) | f) | U/C) |
|----|----|----|----|----|----|------|

**Uses advanced ultrasound modes when necessary (M-mode, Colour, Doppler):**

|    |    |    |    |    |    |      |
|----|----|----|----|----|----|------|
| a) | b) | c) | d) | e) | f) | U/C) |
|----|----|----|----|----|----|------|

**Appropriately seeks help when necessary:**

|    |    |    |    |    |    |      |
|----|----|----|----|----|----|------|
| a) | b) | c) | d) | e) | f) | U/C) |
|----|----|----|----|----|----|------|

**Formulation of appropriate management plan:**

|    |    |    |    |    |    |      |
|----|----|----|----|----|----|------|
| a) | b) | c) | d) | e) | f) | U/C) |
|----|----|----|----|----|----|------|

**Communication of results to clinical team and / or patient:**

|    |    |    |    |    |    |      |
|----|----|----|----|----|----|------|
| a) | b) | c) | d) | e) | f) | U/C) |
|----|----|----|----|----|----|------|

**Overall clinical competence with procedure:**

|    |    |    |    |    |    |      |
|----|----|----|----|----|----|------|
| a) | b) | c) | d) | e) | f) | U/C) |
|----|----|----|----|----|----|------|

\* U/C Please mark this if you have not observed the behaviour and feel unable to comment.

---

**Which aspects of the encounter were done well?**

---

**Suggested areas for development:**

---

**Agreed action:**

---

Based on this observation please now rate the level of entrustment that can be made for the trainee in relation to the Thoracic Ultrasound CiP:

|                    |                       | TUS Capability in Practice level                                  |                                                                                                      |                                   |                                        |
|--------------------|-----------------------|-------------------------------------------------------------------|------------------------------------------------------------------------------------------------------|-----------------------------------|----------------------------------------|
|                    |                       | 2 - Entrusted to act with direct supervision, present in the room | 3 - Entrusted to act with indirect, reactive supervision: not necessarily present, quickly available | 4 - Entrusted to act unsupervised | 5- Entrusted to supervise/train others |
| <b>TUS Pathway</b> | Emergency TUS Pathway |                                                                   |                                                                                                      |                                   |                                        |
|                    | Primary TUS Pathway   |                                                                   |                                                                                                      |                                   |                                        |
|                    | Advanced TUS Pathway  |                                                                   |                                                                                                      |                                   |                                        |
|                    | Expert TUS pathway    |                                                                   |                                                                                                      |                                   |                                        |
